# Supplementary material
Source: PubMed Central journal article supplement (PMC1939982)
Supplement: NIHMS20884-supplement-Supp_table2.pdf [file NIHMS20884-supplement-Supp_table2.pdf]

**Supplementary Table II.** Input for the calculation and characterization of the energy-minimized NMR structures of Prp24-12 (residues 39-197).

| Quantity                                         | Value <sup>a</sup> |             |
|--------------------------------------------------|--------------------|-------------|
| NOE upper distance limits                        | 1670               |             |
| Dihedral angle constraints                       | 212                |             |
| Hydrogen bond constraints                        | 64                 |             |
| Residual target function value (Å <sup>2</sup> ) | 2.85 ± 0.25        |             |
| Residual distance constraint violations          |                    |             |
| Number ≥ 0.1 Å                                   | 24 ± 5             |             |
| Maximum Å                                        | 0.24 ± 0.2         |             |
| Residual dihedral angle constraint violations    |                    |             |
| Number ≥ 2.5°                                    | 1.0 ± 1.0          |             |
| Maximum Å                                        | 2.8 ± 1.5          |             |
| RMSD to the mean coordinates <sup>b</sup>        |                    |             |
| N,Cα, C' (39-161)                                | 1.53 ± 0.15        |             |
| N,Cα, C' of regular secondary structure          | 0.97 ± 0.09        |             |
| All heavy atoms of regular secondary structure   | 1.45 ± 0.17        |             |
|                                                  | <b>RRM1</b>        | <b>RRM2</b> |
| N,Cα, C' of regular secondary structure          | 0.42 ± 0.06        | 0.58 ± 0.08 |
| All heavy atoms                                  | 1.14 ± 0.15        | 1.11 ± 0.13 |
| Ramachandran plot statistics <sup>c</sup>        |                    |             |
| Most favored region (%)                          | 78.4               |             |
| Additional allowed region (%)                    | 17.8               |             |
| Generously allowed region (%)                    | 2.1                |             |

<sup>a</sup> Except for the top three entries, data characterize the bundle of 10 conformers used to represent the NMR structure; the mean value and standard deviation are given. RMSDs were determined by CYANA (Guntert et al. 1997) and MOLMOL (Koradi et al. 1996).

<sup>b</sup> Regular secondary structure elements are the α-helices (54-64,91-97,130-139,168-178) and β-strands (43-47,70-73,81-85,110-113,118-122,146-149,160-164,189-193).

<sup>c</sup> As determined by PROCHECK (Morris et al. 1992).

References:

- Morris, A.L., MacArthur, M.W., Hutchinson, E.G. and Thornton, J.M. (1992). Stereochemical quality of protein structure coordinates. *Proteins*, **12**, 345-364.
- Guntert, P., Mumenthaler, C. and Wuthrich, K. (1997). Torsion angle dynamics for NMR structure calculation with the new program DYANA. *J Mol Biol*, **273**, 283-298.
- Koradi, R., Billeter, M. and Wuthrich, K. (1996). MOLMOL: a program for display and analysis of macromolecular structures. *J Mol Graph*, **14**, 51-55, 29-32.
